# Supplementary material
Source: PubMed Central journal article supplement (PMC3718306)
Supplement: NIHMS490174-supplement-01.pdf [file NIHMS490174-supplement-01.pdf]

Type of file: figure

Label: eFigure 1

Filename: eFigure1.emf

COPES parent sample  
(n = 457)

Excluded (n = 25)  
No baseline DISH diagnosis (n = 4)  
Tricyclic antidepressant only (n = 8)  
Major adverse coronary event/mortality (n=2)  
Monoamine-oxidase inhibitor only (n=1)  
SSRI<sup>a</sup> + tricyclic antidepressant (n=4)  
Major adverse coronary event/mortality (n=4)  
SSRI<sup>a</sup> + other second-generation antidepressant (n=8)  
Major adverse coronary event/mortality (n=8)

Analysis sample  
(n = 432)

Not on antidepressant at baseline  
(n = 354)

Only selective serotonin reuptake inhibitor<sup>a</sup> at baseline (n = 58)  
  
Sertraline (n = 24)  
Paroxetine (n = 13)  
Fluoxetine (n = 11)  
Escitalopram (n = 5)  
Citalopram (n = 3)  
Citalopram + Escitalopram (n = 1)  
Paroxetine + Fluoxetine (n = 1)

Only other second-generation antidepressant at baseline (n = 20)  
  
Bupropion (n = 9)  
Trazodone (n = 4)  
Venlafaxine (n = 3)  
Mirtazapine (n = 1)  
Nefazodone + Bupropion (n = 1)  
Trazodone + Bupropion (n = 1)  
Venlafaxine + Bupropion (n = 1)

Major adverse coronary event (n = 76)  
Major adverse coronary event<sup>b</sup> (n=52)  
Mortality<sup>b</sup> (n = 31)

Major adverse coronary event (n = 21)  
Major adverse coronary event<sup>b</sup> (n=14)  
Mortality<sup>b</sup> (n = 9)

Major adverse coronary event (n = 4)  
Major adverse coronary event<sup>b</sup> (n=3)  
Mortality<sup>b</sup> (n = 1)

Antidepressant Use  
  
42 mo. Major Adverse Coronary Event/Mortality

Type of file: figure

Label: eFigure 2

Filename: eFigure2.emf

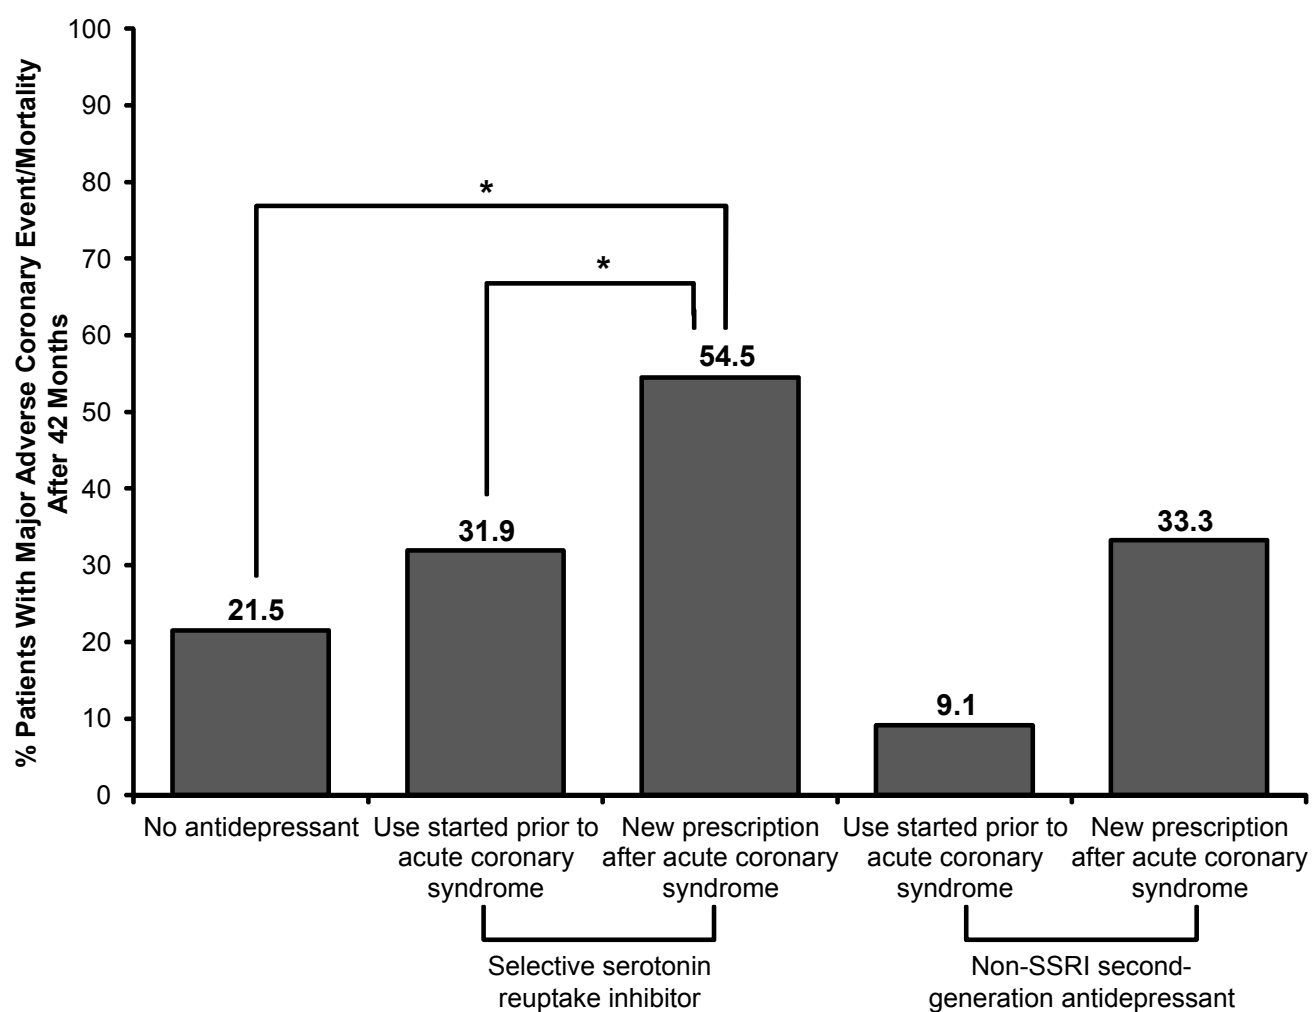

Type of file: table

Label: eTable 1

Filename: eTable 1.docx

**eTable 1. Sample Characteristics According to Antidepressant Medication Status<sup>a</sup>**

|                                                          | No<br>Antidepressant<br>(n = 354) | Only Selective<br>Serotonin<br>Reuptake<br>Inhibitor<br>(n = 58) | Only non-SSRI Second-<br>Generation<br>Antidepressant<br>(n = 20) | P Value            |
|----------------------------------------------------------|-----------------------------------|------------------------------------------------------------------|-------------------------------------------------------------------|--------------------|
| Women, No. (%)                                           | 125 (38.1)                        | 30 (51.7)                                                        | 12 (60.0)                                                         | .03                |
| Age, y                                                   | 61.4 (12.4)                       | 59.2 (13)                                                        | 57.6 (15.1)                                                       | .21                |
| White, No. (%)                                           | 275 (77.7)                        | 52 (89.7)                                                        | 17 (85.0)                                                         | .09                |
| Hispanic, No. (%)                                        | 34 (9.6)                          | 6 (10.3)                                                         | 2 (10.0)                                                          | .98                |
| Admission diagnosis                                      |                                   |                                                                  |                                                                   |                    |
| Unstable Angina                                          | 151 (42.7)                        | 35 (60.3)                                                        | 10 (50.0)                                                         | .08                |
| Non-ST segment elevation myocardial infarction           | 120 (33.9)                        | 15 (25.9)                                                        | 8 (40.0)                                                          |                    |
| ST segment elevation myocardial infarction               | 83 (23.4)                         | 8 (13.8)                                                         | 2 (10.0)                                                          |                    |
| Left ventricular ejection fraction <40%                  | 59 (16.7)                         | 5 (8.6)                                                          | 3 (15.0)                                                          | .29                |
| Charlson comorbidity index                               | 1.2 (1.5)                         | 1.7 (1.6)                                                        | 1.7 (1.4)                                                         | .05                |
| Global Registry of Acute Coronary Events risk score      | 90.6 (29.9)                       | 91.4 (36.8)                                                      | 89.4 (38.5)                                                       | .97                |
| Beck Depression Inventory score at baseline              | 7.55 (8.26)                       | 12.57 (8.21)                                                     | 11.60 (11.20)                                                     | <.001 <sup>b</sup> |
| Beck Depression Inventory score ≥16 at baseline, No. (%) | 37 (10.5)                         | 13 (22.4)                                                        | 3 (15.0)                                                          | .03                |
| Major Depressive Disorder at baseline, No. (%)           | 24 (6.8)                          | 12 (20.7)                                                        | 6 (30)                                                            | <.001 <sup>b</sup> |
| History of Major Depressive Disorder, No. (%)            | 73 (21.4)                         | 36 (64.3)                                                        | 7 (38.9)                                                          | <.001 <sup>b</sup> |
| Major Depressive Disorder at 3 months, No. (%)           | 20 (6.3)                          | 10 (18.2)                                                        | 3 (16.7)                                                          | .006               |
| Psychotherapy or counseling at 1 month                   | 9 (2.8)                           | 8 (14.5%)                                                        | 2 (10.5%)                                                         | <.001 <sup>b</sup> |

<sup>a</sup>Values are mean (SD) unless otherwise indicated.

<sup>b</sup>Significant difference between groups after Bonferroni correction ( $\alpha \leq .003$ ).

Type of file: table

Label: eTable 2

Filename: eTable 2.docx

**eTable 2. Hazard of 42-month Major Adverse Coronary Event/Mortality among Selective Serotonin Reuptake Inhibitor Users and non-SSRI Second-Generation Antidepressant Users Compared to No Antidepressant Users (N=432)**

| Predictors                                                                   | Hazard Ratio (95% CI) | P Value |
|------------------------------------------------------------------------------|-----------------------|---------|
| <b>Model 1 Covariate-Adjusted</b>                                            |                       |         |
| Age                                                                          | 1.21 (0.88-1.66)      | .26     |
| Female                                                                       | 0.74 (0.48-1.13)      | .16     |
| Non-white                                                                    | 1.37 (0.83-2.24)      | .22     |
| Left ventricular ejection fraction < 40                                      | 1.74 (1.04-2.90)      | .04     |
| Charlson comorbidity index                                                   | 1.41 (1.17-1.70)      | < .001  |
| Global Registry of Acute Coronary Events risk score                          | 0.97 (0.67-1.40)      | .81     |
| Index Admission ACS Diagnosis                                                |                       |         |
| Unstable angina                                                              | 1.00 [Reference]      |         |
| Non-ST segment elevation myocardial infarction                               | 1.42 (0.90-2.25)      | .14     |
| ST segment elevation myocardial infarction                                   | 0.87 (0.49-1.55)      | .64     |
| Type of Antidepressant Use                                                   |                       |         |
| No antidepressant                                                            | 1.00 [Reference]      |         |
| Only selective serotonin reuptake inhibitor                                  | 2.12 (1.27-3.52)      | .04     |
| Only non-SSRI second-generation antidepressant                               | 0.97 (0.35-2.68)      | .95     |
| <b>Model 2: Covariate<sup>a</sup> and Beck Depression Inventory-Adjusted</b> |                       |         |
| No Antidepressant                                                            | 1.00 [Reference]      |         |
| Only selective serotonin reuptake inhibitor                                  | 1.83 (1.09-3.06)      | .02     |
| Only non-SSRI second-generation antidepressant                               | 0.86 (0.31-2.42)      | .78     |
| Beck Depression Inventory Score                                              | 1.34 (1.09-1.64)      | .003    |
| <b>Model 3: Covariate<sup>a</sup> and Major Depressive Episode-Adjusted</b>  |                       |         |
| No antidepressant                                                            | [Reference]           |         |
| Only selective serotonin reuptake inhibitor                                  | 1.95 (1.16-3.28)      | .01     |
| Only non-SSRI second-generation antidepressant                               | 0.85 (0.30-2.40)      | .76     |
| Major Depressive Episode                                                     | 1.68 (0.93-3.05)      | .09     |

<sup>a</sup> Adjusted for age, sex, race, Charlson comorbidity index score, Global Registry of Acute Coronary Events risk score, left ventricular ejection fraction, and index admission acute coronary syndrome diagnosis



Type of file: table

Label: eTable 3

Filename: eTable 3.docx

**eTable 3. Hazard of 42-month Major Adverse Coronary Event/Mortality associated with Prior versus New Onset Selective Serotonin Reuptake Inhibitor - and Non-SSRI Second-Generation Antidepressant Use Compared with no Antidepressant Use<sup>a</sup>**

| Predictors                                                                             | Hazard Ratio (95% CI) | P    |
|----------------------------------------------------------------------------------------|-----------------------|------|
| <b>Model 1: All antidepressants versus no antidepressant use</b>                       |                       |      |
| No antidepressant                                                                      | 1.00 [Reference]      |      |
| Antidepressant prior to acute coronary syndrome                                        | 1.16 (0.66-2.06)      | .61  |
| New onset antidepressant-use after acute coronary syndrome                             | 3.51 (1.67-7.27)      | .001 |
| Beck Depression Inventory score                                                        | 1.37 (1.14-1.65)      | .001 |
| <b>Model 2: Selective serotonin reuptake inhibitor versus no antidepressant use</b>    |                       |      |
| No antidepressant                                                                      | 1.00 [Reference]      |      |
| Selective serotonin reuptake inhibitor prior to acute coronary syndrome                | 1.48 (0.82-2.66)      | .19  |
| New onset selective serotonin reuptake inhibitor-use after acute coronary syndrome     | 4.79 (1.93-11.89)     | .001 |
| Beck Depression Inventory score                                                        | 1.33 (1.09-1.63)      | .005 |
| <b>Model 3: Non-SSRI second-generation antidepressant versus no antidepressant use</b> |                       |      |
| No antidepressant                                                                      | 1.00 [Reference]      |      |
| Non-SSRI second-generation antidepressant use prior to acute coronary syndrome         | 0.27 (0.04-2.0)       | .20  |
| New onset non-SSRI second-generation antidepressant-use after acute coronary syndrome  | 2.31 (0.71-7.55)      | .16  |
| Beck Depression Inventory score                                                        | 1.36 (1.11-1.67)      | .004 |

<sup>a</sup> Adjusted for age, sex, race, Charlson comorbidity index score, Global Registry of Acute Coronary Events risk score, left ventricular ejection fraction, and baseline acute coronary syndrome diagnosis
